# Supplementary material
Source: PubMed Central journal article supplement (PMC1289414)

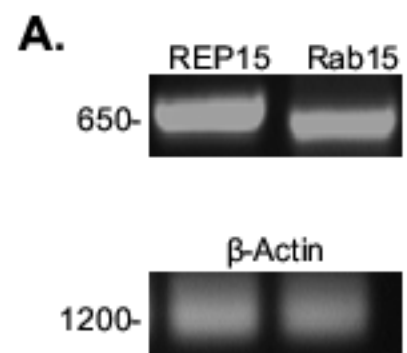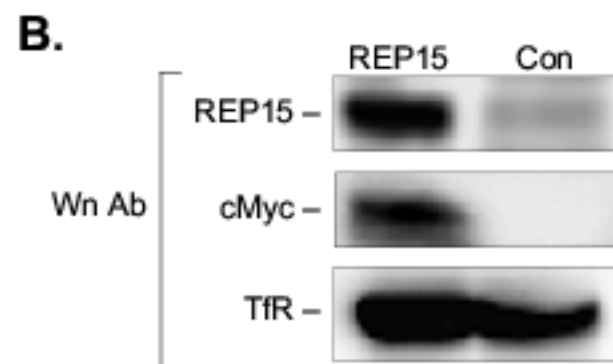

Supplement: mbc_E05-03-0204_1.pdf [file mbc_E05-03-0204_1.pdf]

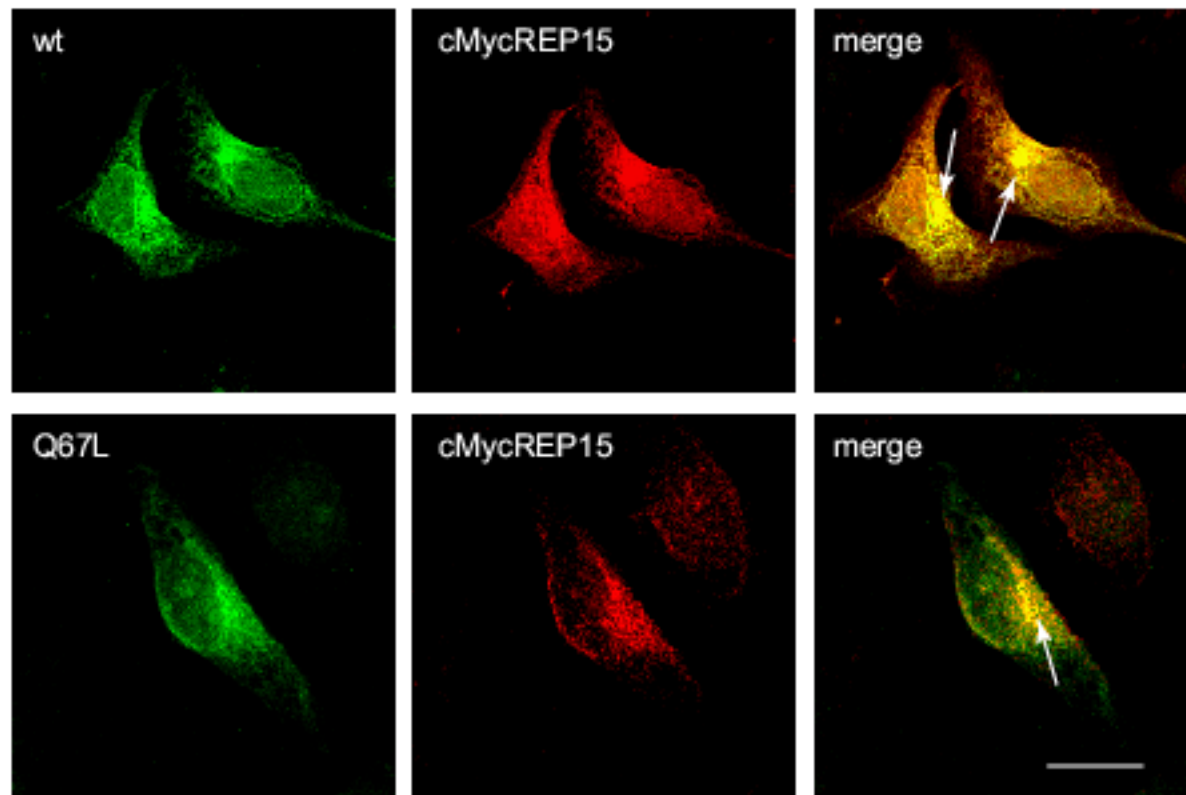

Supplement: mbc_E05-03-0204_2.pdf [file mbc_E05-03-0204_2.pdf]

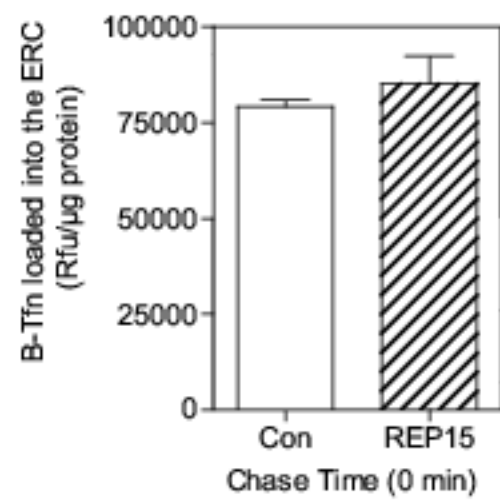

Supplement: mbc_E05-03-0204_3.pdf [file mbc_E05-03-0204_3.pdf]

**A.**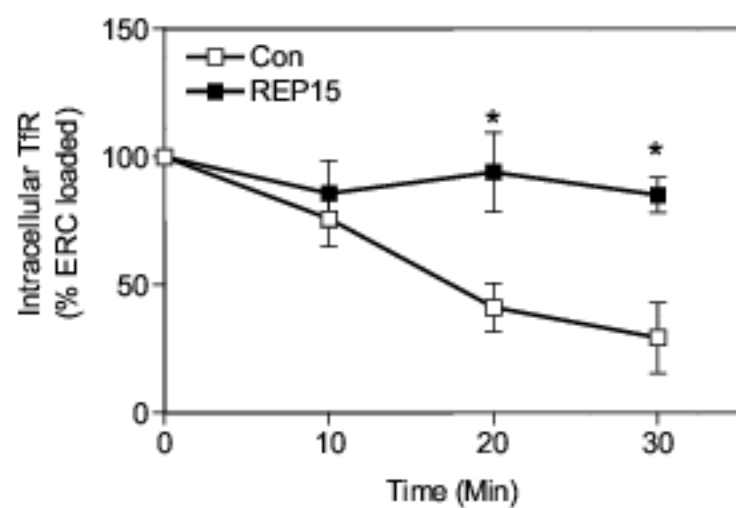**B.**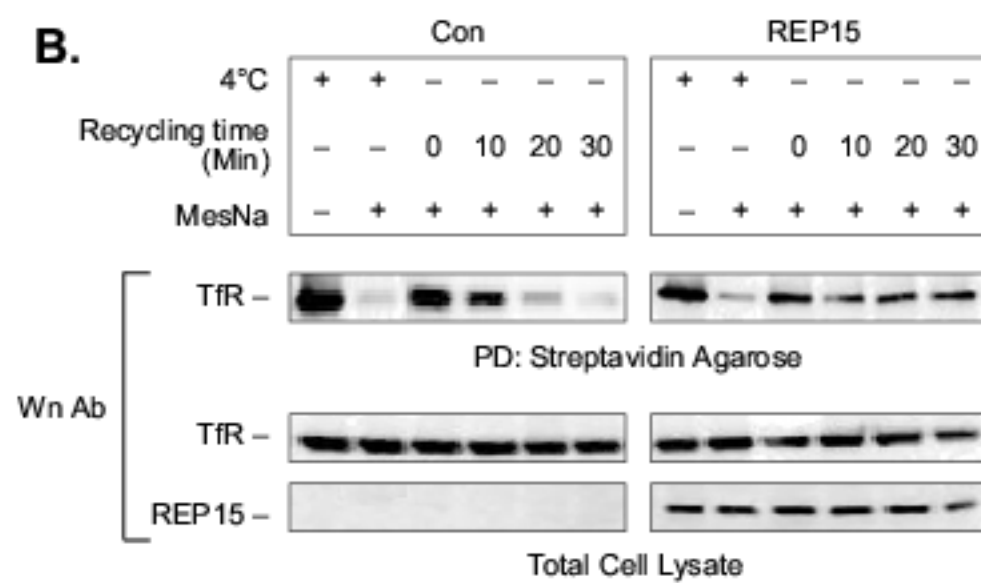

Supplement: mbc_E05-03-0204_4.pdf [file mbc_E05-03-0204_4.pdf]
